# Supplementary material
Source: PubMed Central journal article supplement (PMC4280582)
Supplement: pnas.201419581SI.pdf [file pnas.201419581SI.pdf]

# Supporting Information

Unal Gulsuner et al. 10.1073/pnas.1419581111

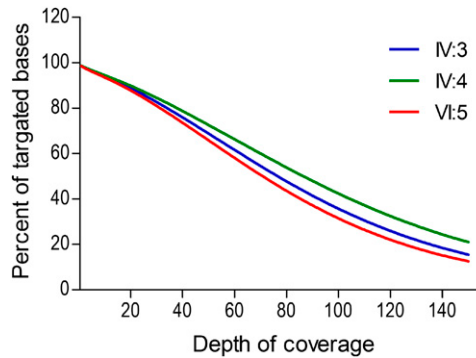

Fig. S1. Percentage of targeted bases covered at particular depths.

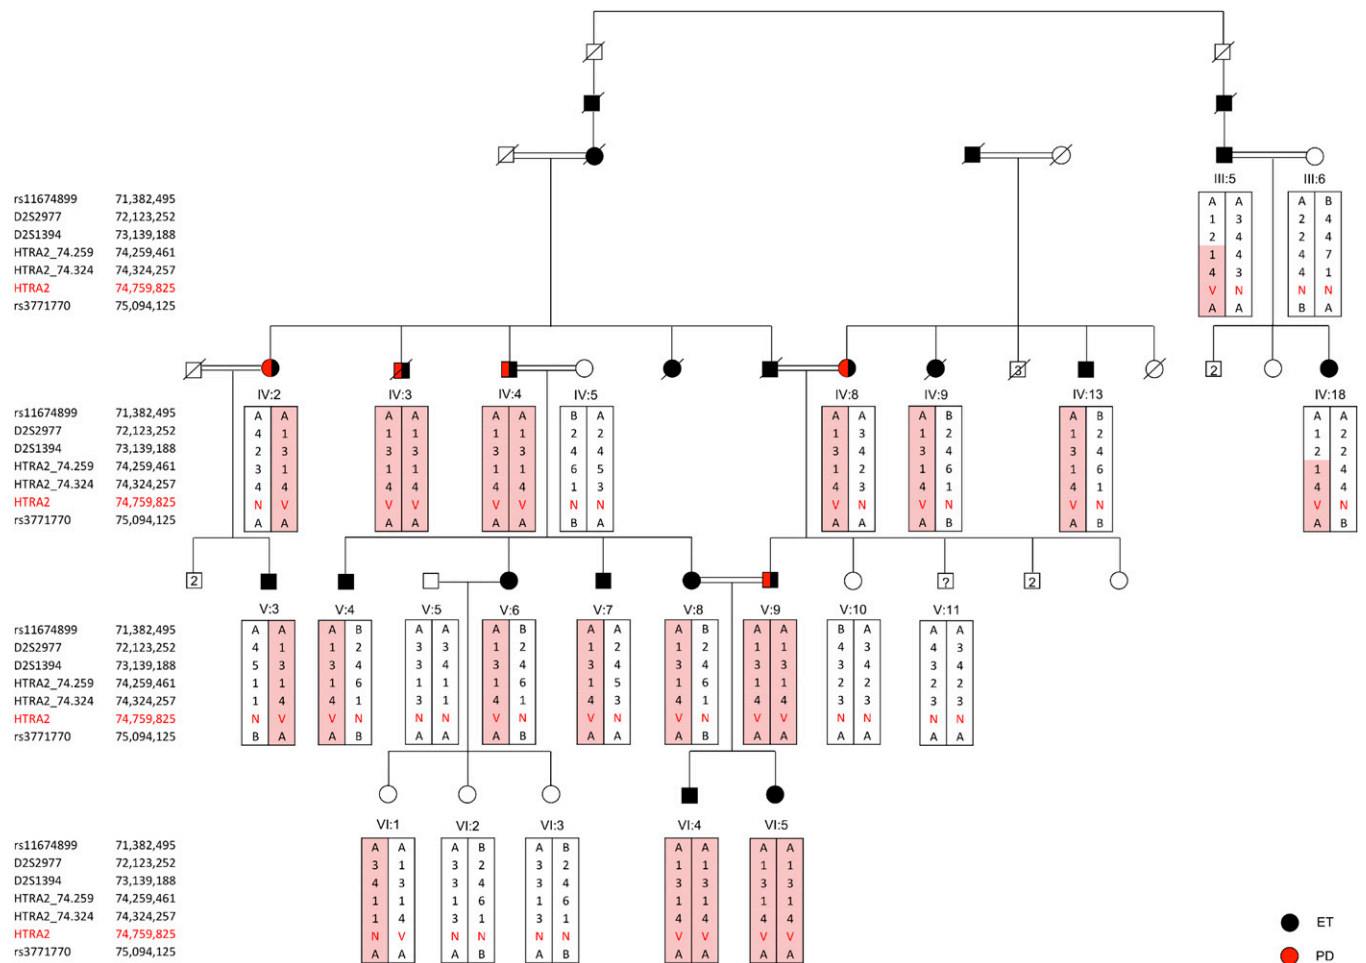

Fig. S2. Haplotype structure at the *HTRA2* locus for the ET-1 family. All participating family members were genotyped for six informative markers spanning 3.7 mb flanking *HTRA2* and haplotypes constructed by direct pedigree analysis. The 12 subjects heterozygous for *HTRA2* p.G399S harbor 9 different haplotypes for their alternate allele, providing strong evidence against a second pathogenic mutation closely linked to *HTRA2*.

| Marker                                            | Chr | Position    | Unaffected    |               | Affected      |                | Affected |      | Affected |      | Affected |   | Affected |   |   |
|---------------------------------------------------|-----|-------------|---------------|---------------|---------------|----------------|----------|------|----------|------|----------|---|----------|---|---|
|                                                   |     |             | IV:5 (mother) | IV:5 (father) | IV:4 (father) | V:8 (daughter) | VI:5     | IV:3 | IV:3     | IV:8 |          |   |          |   |   |
| <b>ETM1, 3q13.31, DRD3</b>                        |     |             | A             | A             | A             | A              | A        | A    | A        | B    | B        | B | B        |   |   |
| rs4352392                                         | 3   | 110,081,245 | B             | B             | B             | B              | B        | B    | B        | A    | A        | A | A        |   |   |
| rs6800418                                         | 3   | 110,087,264 | A             | A             | A             | A              | A        | A    | A        | B    | B        | B | B        |   |   |
| rs10511311                                        | 3   | 112,055,839 | A             | A             | A             | A              | A        | A    | A        | B    | B        | B | B        |   |   |
| rs16860145                                        | 3   | 112,556,393 | B             | B             | B             | B              | B        | B    | B        | A    | A        | A | A        |   |   |
| rs12494693                                        | 3   | 112,677,529 | A             | A             | A             | A              | A        | A    | A        | B    | B        | B | B        |   |   |
| rs12495201                                        | 3   | 112,896,373 | B             | B             | B             | B              | B        | B    | B        | A    | A        | A | A        |   |   |
| rs2614191                                         | 3   | 113,269,201 | A             | A             | A             | A              | A        | A    | A        | B    | B        | B | B        |   |   |
| rs6799683                                         | 3   | 113,674,025 | B             | B             | B             | B              | B        | B    | B        | A    | A        | A | A        |   |   |
| rs4682516                                         | 3   | 113,817,246 | A             | A             | A             | A              | A        | A    | A        | B    | B        | B | B        |   |   |
| rs7649438                                         | 3   | 113,922,090 | B             | B             | B             | B              | B        | B    | B        | A    | A        | A | A        |   |   |
| rs12487346                                        | 3   | 114,257,976 | A             | A             | A             | A              | A        | A    | A        | B    | B        | B | B        |   |   |
| rs11929078                                        | 3   | 115,484,045 | A             | A             | A             | A              | A        | A    | A        | B    | B        | B | B        |   |   |
| rs12695341                                        | 3   | 116,606,836 | A             | A             | A             | A              | A        | A    | A        | B    | B        | B | B        |   |   |
| rs7618185                                         | 3   | 116,725,080 | A             | A             | A             | A              | A        | A    | A        | B    | B        | B | B        |   |   |
| rs7614474                                         | 3   | 117,871,884 | A             | A             | A             | A              | A        | A    | A        | B    | B        | B | B        |   |   |
| rs4568126                                         | 3   | 118,948,256 | A             | A             | A             | A              | A        | A    | A        | B    | B        | B | B        |   |   |
| rs4234657                                         | 3   | 118,948,288 | B             | B             | B             | B              | B        | B    | B        | A    | A        | A | A        |   |   |
| <b>ETM2, 2p25-p22, max lod at D2S272</b>          |     |             | B             | B             | B             | B              | B        | B    | A        | A    | A        | A |          |   |   |
| rs1564630                                         | 2   | 13,360,138  | A             | A             | A             | A              | A        | A    | A        | B    | B        | B | B        |   |   |
| rs10172465                                        | 2   | 13,685,130  | A             | A             | A             | A              | A        | A    | A        | B    | B        | B | B        |   |   |
| rs1349164                                         | 2   | 14,428,848  | A             | A             | A             | A              | A        | A    | A        | B    | B        | B | B        |   |   |
| rs4340489                                         | 2   | 14,665,842  | A             | A             | A             | A              | A        | A    | A        | B    | B        | B | B        |   |   |
| rs2705845                                         | 2   | 14,907,998  | A             | A             | A             | A              | A        | A    | A        | B    | B        | B | B        |   |   |
| rs12616198                                        | 2   | 15,176,929  | B             | B             | B             | B              | B        | B    | B        | A    | A        | A | A        |   |   |
| rs12464087                                        | 2   | 15,902,912  | B             | B             | B             | B              | B        | B    | B        | A    | A        | A | A        |   |   |
| rs11885671                                        | 2   | 16,205,386  | A             | A             | A             | A              | A        | A    | A        | B    | B        | B | B        |   |   |
| rs6761668                                         | 2   | 16,545,353  | A             | A             | A             | A              | A        | A    | A        | B    | B        | B | B        |   |   |
| rs2002992                                         | 2   | 16,854,602  | A             | A             | A             | A              | A        | A    | A        | B    | B        | B | B        |   |   |
| rs11096709                                        | 2   | 17,103,115  | A             | A             | A             | A              | A        | A    | A        | B    | B        | B | B        |   |   |
| rs13031329                                        | 2   | 17,388,200  | B             | B             | B             | B              | B        | B    | B        | A    | A        | A | A        |   |   |
| rs10201852                                        | 2   | 17,469,654  | A             | A             | A             | A              | A        | A    | A        | B    | B        | B | B        |   |   |
| rs13019617                                        | 2   | 17,792,215  | A             | A             | A             | A              | A        | A    | A        | B    | B        | B | B        |   |   |
| rs13395500                                        | 2   | 18,275,620  | A             | A             | A             | A              | A        | A    | A        | B    | B        | B | B        |   |   |
| rs4328636                                         | 2   | 19,071,711  | A             | A             | A             | A              | A        | A    | A        | B    | B        | B | B        |   |   |
| rs11096575                                        | 2   | 19,229,595  | B             | B             | B             | B              | B        | B    | B        | A    | A        | A | A        |   |   |
| rs2004115                                         | 2   | 19,811,100  | B             | B             | B             | B              | B        | B    | B        | A    | A        | A | A        |   |   |
| <b>ETM3, 6p23, max lod at D6S1630 and D6S1605</b> |     |             | A             | A             | B             | B              | A        | B    | A        | B    | B        | A | A        |   |   |
| rs9463363                                         | 6   | 13,002,629  | A             | A             | A             | A              | A        | A    | A        | B    | B        | A | A        |   |   |
| rs6936420                                         | 6   | 13,417,746  | B             | B             | B             | B              | B        | B    | B        | A    | A        | B | B        |   |   |
| rs1204166                                         | 6   | 13,836,166  | A             | A             | A             | A              | A        | A    | A        | B    | B        | A | A        |   |   |
| rs853370                                          | 6   | 14,142,674  | B             | B             | B             | B              | B        | B    | B        | A    | A        | B | B        |   |   |
| rs1474561                                         | 6   | 14,749,648  | A             | A             | A             | A              | A        | A    | A        | B    | B        | A | A        |   |   |
| rs6902553                                         | 6   | 14,977,206  | B             | B             | B             | B              | B        | B    | B        | A    | A        | B | B        |   |   |
| rs2038288                                         | 6   | 15,041,943  | A             | A             | A             | A              | A        | A    | A        | B    | B        | A | A        |   |   |
| rs742206                                          | 6   | 15,669,298  | A             | A             | A             | A              | A        | A    | A        | B    | B        | A | A        |   |   |
| rs9476934                                         | 6   | 15,795,336  | B             | B             | B             | B              | B        | B    | B        | A    | A        | B | B        |   |   |
| rs4716044                                         | 6   | 16,088,393  | B             | B             | B             | B              | B        | B    | B        | A    | A        | B | B        |   |   |
| rs9370893                                         | 6   | 16,418,562  | A             | A             | A             | A              | A        | A    | A        | B    | B        | A | A        |   |   |
| rs9383240                                         | 6   | 17,063,094  | B             | B             | B             | B              | B        | B    | B        | A    | A        | B | B        |   |   |
| rs4716167                                         | 6   | 17,627,590  | A             | A             | A             | A              | A        | A    | A        | B    | B        | A | A        |   |   |
| rs16870039                                        | 6   | 18,080,365  | A             | A             | A             | A              | A        | A    | A        | B    | B        | A | A        |   |   |
| rs9477737                                         | 6   | 18,410,621  | A             | A             | B             | B              | A        | B    | A        | B    | B        | A | A        |   |   |
| rs2223288                                         | 6   | 19,512,065  | A             | A             | B             | B              | A        | B    | A        | B    | B        | A | A        |   |   |
| rs994646                                          | 6   | 19,922,050  | A             | A             | B             | B              | A        | B    | A        | B    | B        | A | A        |   |   |
| rs1079801                                         | 6   | 19,945,285  | A             | A             | B             | B              | A        | B    | A        | B    | B        | A | A        |   |   |
| <b>ETM4, 16p11.2, FUS</b>                         |     |             | B             | A             | B             | A              | A        | A    | A        | A    | B        | B | B        | B |   |
| rs7190559                                         | 16  | 25,112,883  | A             | A             | B             | B              | A        | A    | A        | A    | B        | B | B        | B |   |
| rs2966216                                         | 16  | 25,682,287  | B             | B             | B             | B              | A        | A    | A        | A    | B        | B | B        | B |   |
| rs763980                                          | 16  | 26,228,849  | B             | B             | A             | A              | B        | A    | A        | A    | B        | B | B        | B |   |
| rs237157                                          | 16  | 26,621,916  | A             | A             | A             | A              | B        | A    | A        | A    | B        | B | B        | B |   |
| rs11646543                                        | 16  | 27,010,707  | A             | A             | A             | A              | B        | A    | A        | A    | B        | B | B        | B |   |
| rs8061992                                         | 16  | 27,435,038  | B             | B             | A             | A              | B        | B    | B        | B    | A        | A | A        | A |   |
| rs1074631                                         | 16  | 28,554,108  | B             | B             | B             | B              | A        | A    | A        | A    | B        | B | B        | B |   |
| rs4788076                                         | 16  | 28,570,005  | A             | A             | A             | A              | B        | A    | A        | A    | B        | B | B        | B |   |
| rs252246                                          | 16  | 29,241,389  | A             | A             | A             | A              | B        | A    | A        | A    | B        | B | B        | B |   |
| rs2054213                                         | 16  | 30,971,810  | B             | B             | A             | A              | B        | A    | A        | A    | B        | B | B        | B |   |
| rs11640148                                        | 16  | 31,421,417  | B             | B             | B             | B              | A        | A    | A        | A    | B        | B | B        | B |   |
| rs4553646                                         | 16  | 31,536,419  | B             | A             | A             | A              | B        | A    | A        | A    | B        | B | B        | B |   |
| rs1534507                                         | 16  | 31,660,427  | B             | A             | B             | B              | A        | A    | A        | A    | B        | B | B        | B |   |
| rs9939312                                         | 16  | 31,663,822  | B             | A             | B             | B              | A        | A    | A        | A    | B        | B | B        | B |   |
| rs1528317                                         | 16  | 31,691,912  | B             | B             | A             | A              | B        | A    | A        | A    | B        | B | B        | B |   |
| rs12447780                                        | 16  | 31,860,399  | B             | A             | B             | B              | A        | A    | A        | A    | B        | B | B        | B |   |
| rs11648801                                        | 16  | 34,360,980  | A             | A             | A             | A              | B        | A    | A        | A    | B        | B | B        | B |   |
| rs12933929                                        | 16  | 35,111,585  | B             | A             | A             | A              | B        | A    | A        | A    | B        | B | B        | B |   |
| <b>DNAJC13 locus, 3q22.1</b>                      |     |             | A             | A             | B             | A              | A        | A    | A        | A    | A        | B | B        | B | B |
| rs4557179                                         | 3   | 128,366,726 | A             | A             | A             | A              | A        | A    | A        | A    | B        | B | B        | B |   |
| rs1872106                                         | 3   | 129,239,679 | B             | B             | A             | A              | B        | B    | B        | B    | A        | A | A        | A |   |
| rs9818624                                         | 3   | 129,986,838 | A             | A             | A             | A              | B        | A    | A        | A    | B        | B | B        | B |   |
| rs3965152                                         | 3   | 130,954,093 | A             | A             | A             | A              | B        | A    | A        | A    | B        | B | B        | B |   |
| rs6771284                                         | 3   | 131,612,296 | A             | A             | A             | A              | B        | A    | A        | A    | B        | B | B        | B |   |
| rs10470437                                        | 3   | 131,782,733 | B             | B             | A             | A              | B        | B    | B        | B    | A        | A | A        | A |   |
| rs3843864                                         | 3   | 132,117,617 | B             | B             | B             | B              | A        | A    | A        | A    | B        | B | B        | B |   |
| rs1378810                                         | 3   | 132,254,090 | B             | A             | A             | A              | B        | A    | A        | A    | B        | B | B        | B |   |
| rs769097                                          | 3   | 132,981,813 | B             | B             | A             | A              | B        | B    | B        | B    | A        | A | A        | A |   |
| rs4287912                                         | 3   | 133,437,778 | A             | A             | B             | A              | A        | A    | A        | A    | B        | B | B        | B |   |
| rs4974495                                         | 3   | 134,059,270 | A             | A             | B             | B              | A        | A    | A        | A    | B        | B | B        | B |   |
| rs4955460                                         | 3   | 134,669,241 | A             | A             | B             | B              | A        | A    | A        | A    | B        | B | B        | B |   |
| rs868909                                          | 3   | 134,859,834 | A             | A             | B             | B              | A        | A    | A        | A    | B        | B | B        | B |   |
| rs10935157                                        | 3   | 134,983,377 | A             | A             | A             | A              | B        | A    | A        | A    | B        | B | B        | B |   |
| rs10935162                                        | 3   | 135,018,895 | A             | A             | A             | A              | B        | A    | A        | A    | B        | B | B        | B |   |
| rs6774879                                         | 3   | 135,024,271 | A             | A             | A             | A              | B        | A    | A        | A    | B        | B | B        | B |   |
| rs17196097                                        | 3   | 135,607,907 | A             | A             | A             | A              | B        | A    | A        | A    | B        | B | B        | B |   |
| rs521746                                          | 3   | 136,103,920 | B             | B             | B             | B              | A        | A    | A        | A    | B        | B | B        | B |   |

**Fig. S3.** Essential tremor in family ET-1 is not linked to *DNAJC13* or to genomic regions previously reported to be associated with essential tremor. DNA samples from five affected subjects (IV:3, IV:4, IV:8, V:8, and VI:5) and from one unaffected subject (IV:5) were genotyped by using GeneChip mapping 250K NspI SNP arrays and analyzed by using GTYPE software (Affymetrix). Haplotypes were generated to evaluate the possibility of a disease-causing mutation in any of these regions (1–5). At each region, the haplotype shared by the affected father-daughter pair IV:4 and V:8 is indicated in pink. At none of these regions was this haplotype also shared by the other affected family members.

1. Gulcher JR, et al. (1997) Mapping of a familial essential tremor gene, FET1, to chromosome 3q13. *Nat Genet* 17(1):84–87.

2. Higgins JJ, Pho LT, Nee LE (1997) A gene (ETM) for essential tremor maps to chromosome 2p22-p25. *Mov Disord* 12(6):859–864.
3. Shatunov A, et al. (2006) Genomewide scans in North American families reveal genetic linkage of essential tremor to a region on chromosome 6p23. *Brain* 129(Pt 9):2318–2331.
4. Merner ND, et al. (2012) Exome sequencing identifies FUS mutations as a cause of essential tremor. *Am J Hum Genet* 91(2):313–319.
5. Rajput A, et al. (2014) VPS35 and DNAJC13 disease-causing variants in essential tremor. *Eur J Hum Genet*, 10.1038/ejhg.2014.164.



**Table S2. Results of whole exome sequencing of three affected relatives from family ET-1**

| Feature                                             | IV:3       | IV:4              | VI:5       |
|-----------------------------------------------------|------------|-------------------|------------|
| Total number of reads                               | 82,905,251 | 88,364,432        | 83,032,868 |
| % of mapped reads                                   | 98.1       | 98.3              | 97.6       |
| % of targeted bases covered $\geq$ 8X               | 95.1       | 95.4              | 94.6       |
| Joint coverage at $\geq$ 8X,* %                     |            | 93.6              |            |
| Average coverage, X                                 | 90         | 101               | 83         |
| All coding variants                                 | 18,729     | 18,839            | 18,198     |
| Shared by all 3 exomes                              |            | 11,639            |            |
| Rare variants <sup>†</sup>                          |            | 129               |            |
| Predicted damaging to protein function <sup>‡</sup> |            | 13                |            |
| Cosegregation with essential tremor in the family   |            | 1 (HTRA2 p.G3995) |            |

\*Joint coverage was defined as fold coverage for the least well covered of the three samples.

<sup>†</sup>Variants were excluded if minor allele frequency  $\geq$  0.005 on dbSNP138, the 1000 Genomes Project, or the NHLBI Exome Sequencing Project.

<sup>‡</sup>Alleles predicted damaging to protein function were of the following classes: truncating mutations; splice site mutations predicted to lead to altered transcripts; whole gene deletions; and missense variants with all of Polyphen-2 score  $\geq$  0.8, SIFT score  $\leq$  0.05, and Mutation Assessor score  $\geq$  1.95.

**Table S3. Homozygous regions shared by three affected relatives**

| Chromosome | Start      | End        | Size, bp  | All SNVs | Rare potentially damaging SNVs and indels* |
|------------|------------|------------|-----------|----------|--------------------------------------------|
| 2          | 73,518,867 | 75,115,108 | 1,596,241 | 48       | 1                                          |
| 14         | 94,912,799 | 96,157,331 | 1,244,532 | 41       | 0                                          |
| 22         | 16,953,727 | 18,650,682 | 1,696,955 | 77       | 0                                          |

Homozygosity mapping from whole exome data were performed by using PLINK V1.07 with 200 kb minimum segment size (1). In the shared homozygous regions, 98% of all coding bases were sequenced at least four times in at least one subject with average coverage of 76X.

\*Alleles predicted damaging to protein function were of the following classes: truncating mutations; splice site mutations predicted to lead to altered transcripts; whole gene deletions; and missense variants with Polyphen-2 score  $\geq$  0.8, SIFT score  $\leq$  0.05, and Mutation Assessor score  $\geq$  1.95.

1. Purcell S, et al. (2007) PLINK: A tool set for whole-genome association and population-based linkage analyses. *Am J Hum Genet* 81(3):559-575.

**Table S4. All rare coding sequence variants predicted to be damaging and shared by three affected relatives of family ET-1**

| Chr | Position          | Ref      | Var      | Gene         | Effect       | Genotype     | PPH2         | SIFT         | MA          | GERP        | ESP           | 1000G         | Subjects with essential tremor |           |          |
|-----|-------------------|----------|----------|--------------|--------------|--------------|--------------|--------------|-------------|-------------|---------------|---------------|--------------------------------|-----------|----------|
|     |                   |          |          |              |              |              |              |              |             |             |               |               | NN                             | NV        | VV       |
| 2   | 55,194,157        | C        | T        | EML6         | R1839C       | Het          | 0.998        | 0.022        | 2.25        | 6.17        | —             | 0.0009        | 4                              | 10        | 2        |
| 2   | <b>74,759,825</b> | <b>G</b> | <b>A</b> | <b>HTRA2</b> | <b>G3995</b> | <b>Homoz</b> | <b>0.986</b> | <b>0.020</b> | <b>2.39</b> | <b>3.99</b> | <b>0.0034</b> | <b>0.0023</b> | <b>0</b>                       | <b>11</b> | <b>5</b> |
| 3   | 13,359,234        | G        | A        | NUP210       | R1871C       | Het          | 0.999        | 0.021        | 2.07        | 4.58        | —             | —             | 11                             | 5         | 0        |
| 4   | 1,343,416         | T        | C        | UVSSA        | L68P         | Het          | 1.000        | 0.001        | 3.02        | 4.98        | —             | —             | 10                             | 6         | 0        |
| 6   | 13,306,697        | A        | G        | TBC1D7       | L243S        | Het          | 1.000        | 0            | 2.67        | 5.87        | —             | —             | 9                              | 7         | 0        |
| 9   | 104,190,765       | T        | C        | ALDOB        | E122G        | Het          | 0.997        | 0            | 3.36        | 5.87        | 0.0001        | —             | 9                              | 7         | 0        |
| 9   | 135,203,279       | C        | A        | SETX         | V1236F       | Het          | 0.868        | 0.003        | 1.95        | 4.82        | —             | —             | 5                              | 11        | 0        |
| 12  | 52,284,475        | C        | T        | ANKRD33      | R124W        | Het          | 1.000        | 0.001        | 2.28        | —           | 0.0005        | —             | 11                             | 5         | 0        |
| 15  | 41,797,248        | C        | T        | LTK          | R647Q        | Het          | 1.000        | 0            | 2.50        | 3.79        | 0.0003        | —             | 11                             | 5         | 0        |
| 15  | 58,004,256        | G        | A        | GCOM1        | R675Q        | Het          | 0.999        | 0.036        | 1.99        | 2.79        | —             | —             | 6                              | 10        | 0        |
| 15  | 90,328,681        | G        | A        | ANPEP        | R935W        | Het          | 1.000        | 0.013        | 3.12        | 5.31        | 0.0009        | 0.0005        | 11                             | 5         | 0        |
| 17  | 31,098,168        | T        | C        | MYO1D        | Y230C        | Het          | 0.998        | 0            | 3.48        | 5.82        | 0.0008        | —             | 10                             | 6         | 0        |
| 19  | 48,565,262        | G        | A        | PLA2G4C      | P417L        | Het          | 0.819        | 0.013        | 2.48        | 2.79        | —             | —             | 9                              | 7         | 0        |

The variant segregating with essential tremor in the ET-1 family is shown in bold. 1000G, 1000 Genomes Project; Chr, chromosome; ESP, NHLBI Exome Sequencing project; MA, MutationAssessor; N, wild-type allele; PPH2, Polyphen2; Ref, reference base; V, variant allele; Var, variant base.

**Table S5. Primers used for PCR amplification and haplotype analysis**

| Primer name               | Forward                    | Reverse                        |
|---------------------------|----------------------------|--------------------------------|
| <b>Segregation</b>        |                            |                                |
| EML6                      | CTGAGCTTGGGTTTGGAGAA       | CAGATCCTGCACAGACTTGG           |
| HTRA2                     | ATGCCTGGGTTTGGCTAATA       | CAACTGGGATTGGGTTCG             |
| NUP210                    | GTGTGAAGAGACGGCAGTGA       | TGTGAGAGTGTCTGGGTGA            |
| UVSSA                     | AATGAAGATGGGAAGGCAGT       | AGTGGTAGCCCAAGGCAAG            |
| TBC1D7                    | AAACTAACCCCTCAGGCCAAC      | GGGTTTGGGATAAAGTTGTGAG         |
| ALDOB                     | GCTTCCTTCTTTACTTGCCTTC     | GGGTCCCTCGCACAATAACA           |
| SETX                      | GGCTCAGGACACTGACGAA        | CCAATGGCTGAAGATCCTGT           |
| ANKRD33                   | CCCACATCAGTCTTGCTCCT       | GTGGCAGTCACAAGGTGGTC           |
| LTK                       | TACAGGAGGGAGGAGGTGAA       | TCATCCACAGGTTAGGAGCA           |
| GCOM1                     | GGCCATTTCCTTATGTTCCA       | GCTGTTTCTGAAGTGCCAAG           |
| ANPEP                     | GGCTGGAGACTTTGTCCTTG       | AGCTCCTCCTCAAGGCTGTT           |
| MYO1D                     | TGGAGCAATCTCAAAGAGGA       | CTAAGCAAGCAACCACCACA           |
| PLA2G4C                   | CAGAAGTTCGTTGGATGTGG       | CCTGGTGGATGCTGGTTTGA           |
| <b>Coding regions</b>     |                            |                                |
| HTRA2_1                   | GTCCTACTGTCCGCCTGCT        | CTGTGACCACGGCCTCATACT          |
| HTRA2_2                   | TGTGGTGGAGAAGACAGCAC       | AGAGCTAACCAATGCCGGATG          |
| HTRA2_3                   | CGCTGAGGATTCAGACTAAGG      | CTTGGAAAGGAAGGATGTCTCA         |
| HTRA2_4                   | TCAGTGTGGGAAGGGTAGGT       | GACAGAAATGAGAACAAAGCTCA        |
| HTRA2_5                   | TTGATGAGAGACTTGAGGTGGA     | AGGAGTCAGTGCTGGTGGTT           |
| <b>Regulatory regions</b> |                            |                                |
| HTRA2_3UTR                | TGAGGCTCCTGCTCTGATTT       | AGCATGGGAATCCTTGCTC            |
| HTRA2_5UTR1               | CCTCGTGGAAAGCACAGAATC      | GGACACAGGAGGTGGTGACT           |
| HTRA2_5UTR2               | TCACGGTGTACAGGTGGTA        | GAGCGGCTCTTTGACTCG             |
| HTRA2_5UTR3               | CGAGCAGTAGGAAGCAGTCA       | AGCAGGCGGACAGTAGGAC            |
| <b>STRs</b>               |                            |                                |
| HTRA2_74.259              | FAM-GGGAGGAGTTGTGAGAATGC   | GTTTCTTAGCACACAAGAACCAGGTCA    |
| HTRA2_74.324              | HEX-AGCAGGTCACAGAATAGCATGT | GTTTCTTTTTAGATGACTACCCAGACATTG |
| D2S2977                   | FAM-GGCAGCACAGTGACAGATAA   | GTTTCTTCTTCCCCAATCAACTCTCCT    |
| D2S1394                   | FAM-GGCATCTTTATCCTTAGCCC   | GTTTCTTCGGGGTCTGCATTACAGTAT    |
| <b>SNPs</b>               |                            |                                |
| rs11674899                | TTCAAGTGACATTCAAGAGAGAGC   | GTGAGGGTGGAGAGACCAGA           |
| rs3771770                 | AGTGGCCTGACTCTTGTCGT       | GACTACCTCCTCAGTGCTTTCA         |
